# Supplementary material
Source: PubMed Central journal article supplement (PMC7703470)
Supplement: mmc1.pdf [file mmc1.pdf]

# Figure S1

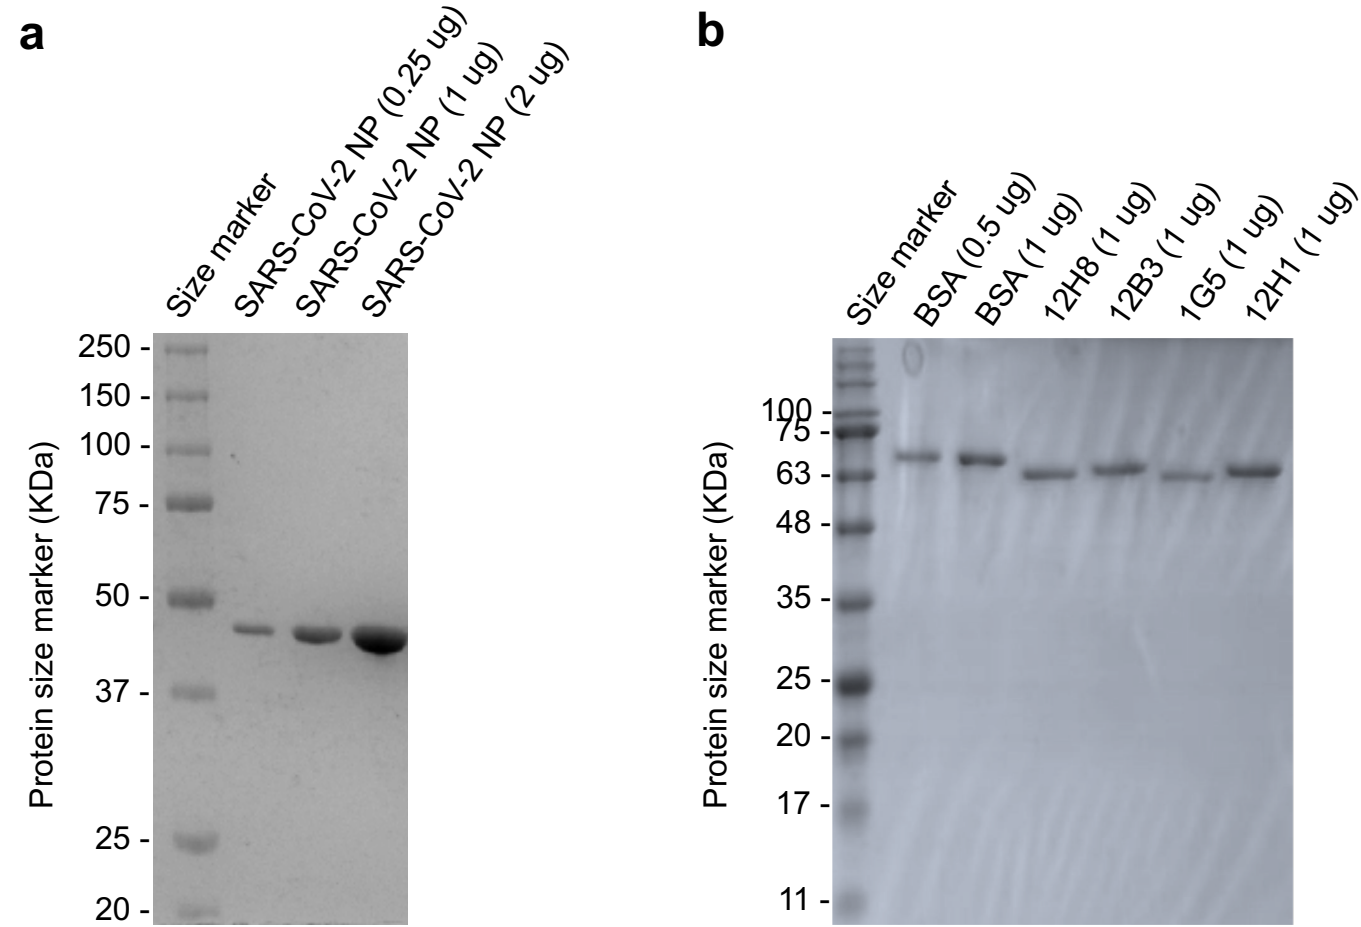

Figure S1. SDS-PAGE analysis of purified recombinant SARS-CoV-2 NP (A) and scFv-Fc antibodies (B).

# Figure S2

## Variable light chain fragment

|      | <b>FR1</b>             | <b>CDR1</b>   | <b>FR2</b>       | <b>CDR2</b> | <b>FR3</b>                          | <b>CDR3</b>      | <b>FR4</b>     |
|------|------------------------|---------------|------------------|-------------|-------------------------------------|------------------|----------------|
| 12H8 | LTQPSSVSANPGETVKITCSGG | <b>GSWYGV</b> | WFQQKSPGSAPVTVIN | <b>ANTN</b> | RPSDIPSRFSGSKSGSTGTLTITGVQADDEAVYFC | <b>GSYDSSTDS</b> | GIFGAGTTLTVLGQ |
| 12B3 | LTQPSSVSANLGETVKITCSGD | <b>SNYYGV</b> | WYQQKSPGSAPVTVIY | <b>DNAK</b> | RPSNIPSRFSGSKSGSTNTLTITGVQAEDEAVYFC | <b>GGWDSDT</b>   | GTFGAGTTLTVLGQ |
| 1G5  | LTQPSSVSANLGGTVKITCSGG | <b>GNDYGV</b> | WYQQKAPGSAPVTVIN | <b>TNDK</b> | RPSDIPSRFSGSKSGSTATLTITGVQAEDEAVYFC | <b>GAYDSSTSA</b> | DIFGAGTTLTVLGQ |
| 12H1 | LTQPSSVSANLGGTVKMTCSGG | <b>SSGYGV</b> | WYQQKSPGSAPVTLIY | <b>YNDK</b> | RPSGIPSRFSGSKSDSTGTLTITGVQAEDEAVYFC | <b>GNTDSSYV</b>  | GMFGAGTTLTVLGQ |

## Variable heavy chain fragment

|      | <b>FR1</b>                     | <b>CDR1</b>  | <b>FR2</b>    | <b>CDR2</b>      | <b>FR3</b>                             | <b>CDR3</b>                    | <b>FR4</b>   |
|------|--------------------------------|--------------|---------------|------------------|----------------------------------------|--------------------------------|--------------|
| 12H8 | AVTLDESGGGLQTPGGGLSLVCKASGFTFS | <b>NYGMD</b> | WVRQAPGKLEWVA | <b>GIDNDGSGR</b> | GYGAAVKGRATISRDNQSTVRLQLNNLRAEDTATYYCA | <b>KSTYGGRGCCDTTDA</b>         | WGHGTEIVSSTS |
| 12B3 | AVTLDESGGGLRTPRGALSLVCKASGFVFS | <b>DHGMA</b> | WVRQAPGKLEWVA | <b>GISSGSGT</b>  | EYGAAVKGRATISRDNQSTVRLQLNNLRAEDTGTYCA  | <b>KTTSPYCGWSGLDYDCGAEDIDA</b> | WGHGTEIVSSTS |
| 1G5  | AVTLDESGGGLQTPGGALSLVCKASGFTFS | <b>SYGMF</b> | WVRQAPGKLEFVA | <b>SITNTGSYT</b> | TYGAAVEGRATISRDNQSTVRLQLNNLRAEDTAIYYCA | <b>KTSCNCGWSGPGYIDA</b>        | WGHGTEIVSSTS |
| 12H1 | AVTLDESGGGLQTPGGTSLVCKASGFTFS  | <b>DRGMH</b> | WVRQAPGKLEWVA | <b>GIRGDGSYT</b> | DYAPAVKGRATISRDNQSTVRLQLNNLRAEDTATYYCA | <b>KSSYKSTWSCRGYESDSIDA</b>    | WGHGTEIVSSTS |

**Figure S2. Derived amino acid sequences of the four scFv clones.** The upper and lower panels shows sequences of the light and heavy chain variable regions, respectively.

# Figure S3

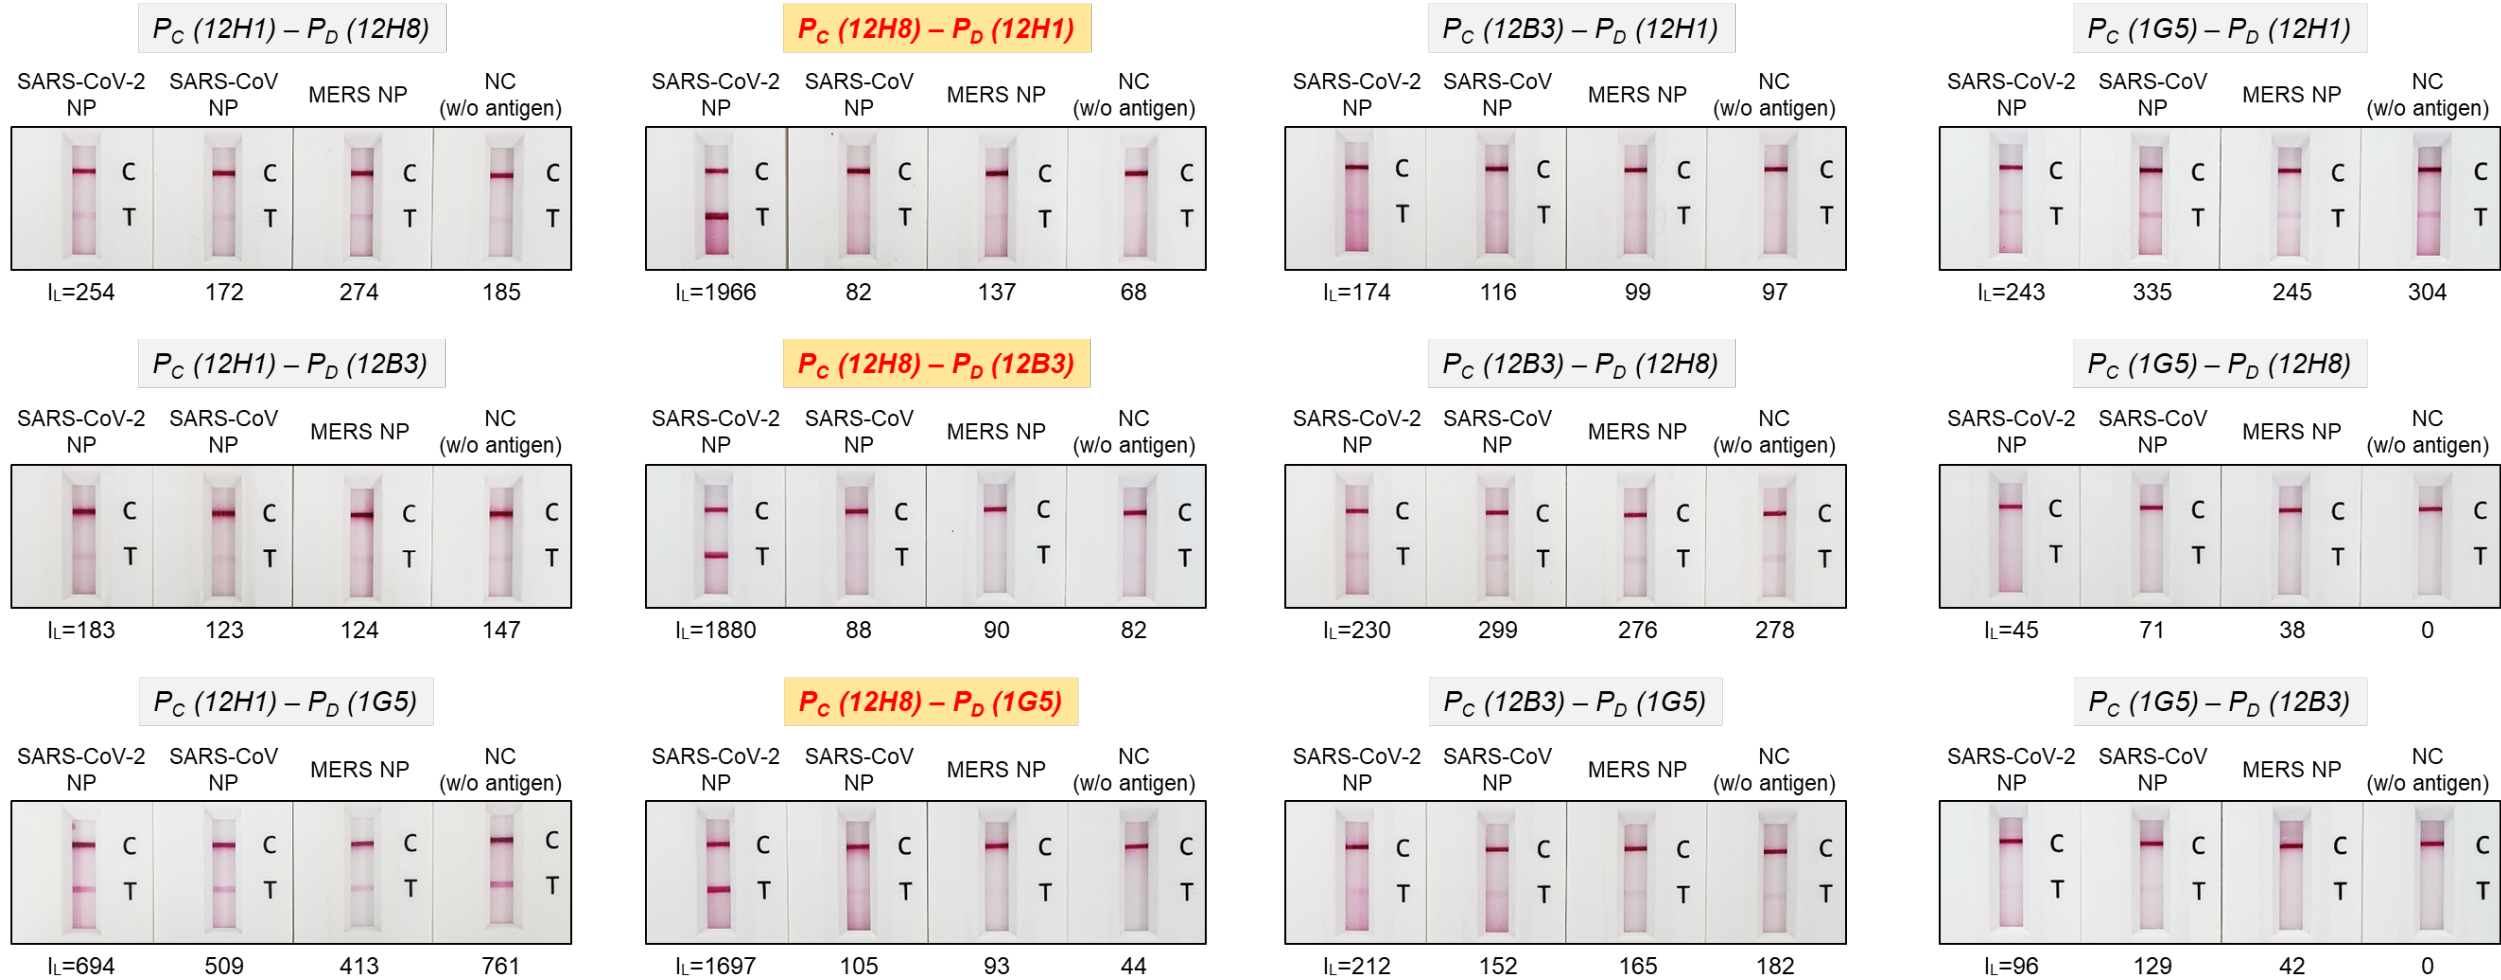

**Figure S3. Discovery of the sandwich pair for the detection of SARS-CoV-2 NP antigen.** A total of 12 pairs were tested to evaluate the diagnostic performance for sensitive and selective detection of SARS-CoV-2 NP. Each of SARS-CoV-2 NP, SARS-CoV NP, MERS-CoV NP, and running buffer were introduced into the LFIA strips. After 20 minutes of sample flow, the line intensities were measured by portable LFIA reader ( $I_L$ : line intensity), and the LFIA strips were photographed with a smartphone.
